# Supplementary material for: Effects of pharmaceutically active compounds (PhACs) on fish body and scale shape in natural waters
Source: PeerJ. 2021 Feb 11;9:e10642. doi: 10.7717/peerj.10642 (PMC7882141; doi:10.7717/peerj.10642)
Supplement: Supplemental Information 5 [file peerj-09-10642-s005.xlsx]

## Sheet: CV-scores of chub body shape
Group	CV1	CV2	CV3	CV4	CV5
BUKIZB	2.2454	-2.60899	-0.779952	0.810799	0.498602
BUKIZB	-1.3005	-1.9759	2.29473	-0.541783	1.33893
BUKIZB	0.801364	-3.60312	3.26818	-2.20782	-0.850492
BUKIZB	-0.491469	-3.13346	0.567734	0.0718226	-0.548868
BUKIZB	1.27936	-2.36835	1.42118	-0.913449	-0.662362
BUKIZB	-0.622839	-3.88227	0.645531	-0.341391	-0.701778
BUKIZB	0.165444	-1.20255	1.2037	-0.310439	-1.10856
BUKIZB	0.576876	-3.31933	2.1091	1.59109	-0.0291982
BUKIZB	2.14637	-2.76694	0.938331	2.11991	0.109896
BUKSZE	1.84418	-0.929646	-1.04275	-0.661771	1.3561
BUKSZE	2.68538	-1.43667	0.558296	2.23587	1.59487
BUKSZE	1.87564	-1.39963	0.561934	-0.0599801	1.15045
BUKSZE	2.43015	1.94821	0.146226	0.927285	0.651104
BUKSZE	1.05669	0.449638	0.125035	1.00596	-1.64968
BUKSZE	2.27055	-1.81619	-1.12362	-0.210517	0.330871
BUKSZE	1.95266	0.389034	1.3237	-0.0973889	1.00091
BUKSZE	2.20603	0.351125	-0.58938	0.051772	0.00869059
BUKSZE	3.0044	0.521653	0.144193	-0.699449	-0.478075
BUKSZE	2.20933	0.882216	0.420976	-1.80606	-0.156461
BUKSZE	1.78639	0.277733	0.277364	-0.0794824	-0.550426
BUKSZE	0.96262	-0.129826	-1.95193	-0.669724	0.714109
BUKSZE	2.51243	-0.910182	0.505648	-0.894621	1.32335
BUKSZE	2.66402	0.134685	-0.152295	1.04467	2.08175
BUKSZE	2.54886	2.28268	-0.43596	1.27822	0.402365
BUKSZE	1.50514	0.794493	-1.1899	-0.314977	0.740852
BUKSZE	2.31563	1.8469	-1.01162	-0.39619	-0.0718311
BUKSZE	0.340352	-0.0241486	-1.22048	0.0910489	0.774987
BUKSZE	1.4977	-0.639007	-0.835226	-0.929169	0.00388096
BUKSZE	2.80479	0.636561	0.927061	1.06878	0.254393
BUKSZE	3.9232	1.63881	1.05831	-1.76864	0.380723
BUKSZE	2.76396	0.420216	-0.821463	0.930766	1.27336
BUKSZE	2.28176	-0.379168	-1.51821	-0.352668	-0.463669
BUKTOR	1.64948	1.41285	-0.0554561	-2.35922	-0.930586
BUKTOR	0.9063	0.937391	0.598609	0.121761	-0.733099
BUKTOR	1.74799	0.258995	-0.759342	1.21129	-1.0719
BUKTOR	-0.744506	1.49327	0.684895	-0.312319	-0.382284
BUKTOR	1.08482	2.15844	0.945228	0.193742	-1.44382
BUKTOR	-1.47968	1.31975	0.474789	-0.58266	0.32392
BUKTOR	0.727484	1.16221	0.402947	-0.666234	-0.607733
BUKTOR	-0.306999	0.663703	0.285895	-0.308412	-1.3335
BUKTOR	0.495844	0.140719	0.0862885	0.142235	-1.64696
BUKTOR	-1.02717	1.1899	-0.630645	0.949765	-0.477784
BUKTOR	-2.0942	0.0887724	-0.052408	0.803709	-1.52029
BUKTOR	0.937227	0.0808586	0.262085	0.377736	-1.79102
BUKTOR	0.856761	0.596958	1.1676	-1.0656	-0.0501574
BUKTOR	2.2752	1.47163	-0.7884	-0.25307	1.00194
BUKTOR	0.056417	0.118235	0.577902	-1.73273	-0.241038
BUKTOR	0.493557	0.634202	-0.0856237	-0.49684	-0.571699
BUKTOR	0.225694	1.17325	1.33112	-0.679996	-1.73529
BUKTOR	0.779517	1.63917	-0.362556	-0.631408	0.526486
BUKTOR	1.59388	0.760227	0.391864	0.546418	-0.22909
BUKTOR	0.941723	-0.298963	0.349358	0.607204	-2.05889
BUKTOR	-0.430643	2.45835	0.157479	0.847124	-1.48512
BUKTOR	-0.402251	2.42996	0.759331	0.286276	-0.0918763
BUKTOR	0.527404	0.641143	-0.318675	-0.797017	0.708891
BUKTOR	-0.784145	-0.340881	-1.68303	-0.370087	0.019634
HOSKAM	-0.504923	-2.54663	-3.40095	1.20517	-1.60133
HOSKAM	0.67751	-2.21784	-1.07282	3.21413	-0.648018
HOSKAM	-0.637282	-0.449702	-2.71322	0.675775	-0.567924
HOSKAM	-2.02175	-1.5522	-2.87234	2.78256	0.614197
HOSKEL	-2.5636	0.43615	1.04286	-0.853581	-0.624296
HOSKEL	-1.52152	-0.997394	-1.16984	-0.11497	2.03322
HOSKEL	-0.219747	-0.365901	-1.24101	-0.211605	0.608232
HOSKEL	-3.05553	-1.29777	-2.65604	-2.30174	0.262747
HOSKEL	-0.834464	0.23492	-1.56677	-0.566723	-0.623159
HOSKEL	-3.2153	-1.40371	2.61273	-0.038269	-0.13477
HOSKEL	-1.77371	-1.34808	-1.33775	-1.98995	-0.352715
HOSKEL	-2.27143	1.9582	-1.40671	-1.70258	-1.62146
HOSKEL	-2.09831	0.441946	-0.844485	-2.45158	0.253453
HOSKEL	-1.53878	-2.11917	-1.71262	-0.349726	0.822123
HOSKEL	-0.314464	-1.04206	-1.34486	-3.15686	0.624282
HOSKEL	-3.5845	-2.11951	-0.330369	-2.2426	0.889725
HOSTOR	-2.12107	-0.2983	-0.222453	0.54997	-0.448138
HOSTOR	-1.63005	1.30801	0.688722	-0.399488	1.38871
HOSTOR	-2.04003	1.18899	-0.876318	1.49455	0.725128
HOSTOR	0.260243	0.0418721	1.12394	-0.0945164	-0.025444
HOSTOR	-2.6425	-0.464028	1.18569	1.36267	0.963913
HOSTOR	-2.41517	2.28025	1.05299	2.06518	0.484486
HOSTOR	-2.50996	0.428791	-0.28822	-0.0869114	2.15552
HOSTOR	-2.10592	2.92312	1.21365	-0.723494	4.53818
HOSTOR	-1.15661	0.230123	1.8217	1.08239	-0.675341
HOSTOR	-1.43948	-0.4955	2.51362	2.15084	2.0337
HOSTOR	-3.08749	0.498755	0.131517	1.05955	0.278922
HOSTOR	-0.613342	-0.319456	1.25014	-0.69844	-0.741987
HOSTOR	-2.3645	1.97188	-0.143831	1.58446	-1.80789
HOSTOR	-1.47779	1.26012	-1.75035	0.624724	-0.297425
HOSTOR	-2.6306	0.750091	0.018251	0.607789	-0.505536
HOSTOR	-1.04228	-1.14749	0.870444	-0.404269	-0.650975
HOSTOR	-4.18922	1.03277	1.84988	0.192225	0.0448691
HOSTOR	-1.859	-0.0904315	0.945412	0.159013	-0.386078
HOSTOR	-1.72904	1.05048	-0.934286	1.77217	0.0935669

## Sheet: CV-scores for chub scale shape
Group	CV1	CV2	CV3	CV4	CV5	CV6	CV7	CV8
HOSTOR2	-0.0531522	0.584908	0.912777	-0.238886	0.894442	-0.512242	0.313538	-1.782
HOSTOR2	2.19191	0.336563	0.820584	0.440694	-0.322407	0.355052	-1.42025	0.0669692
HOSTOR2	-0.0889354	0.850885	0.946461	1.27569	-0.570236	-0.950404	0.125965	2.28395
HOSTOR2	-0.907162	2.48552	0.416252	1.28085	-0.55375	-0.955364	-0.911662	0.369235
HOSTOR2	1.70043	0.483676	0.148892	0.298524	0.311995	0.509259	-1.11647	0.459407
HOSTOR2	-0.255952	-1.28979	-2.32502	-0.00958286	0.539203	-0.341272	-0.340323	0.22721
HOSTOR2	0.922685	1.35633	1.35492	0.941535	-1.21585	-0.0845474	-0.375349	-1.20001
HOSTOR2	-0.813896	1.34838	1.13439	0.786509	-1.08774	0.566724	0.948869	-0.643163
HOSTOR2	-1.167	-0.245202	2.11836	1.45229	-0.455346	0.133377	-0.101129	-0.0710712
HOSTOR2	1.35458	1.14983	1.77749	-0.266699	0.55009	0.382975	1.85069	-0.670385
HOSTOR2	0.173767	-0.283713	0.504443	-1.15496	0.702021	-2.10621	-0.175374	-0.231512
HOSTOR2	0.539256	-1.72192	0.316034	1.14949	-2.05672	0.28228	0.3694	2.43691
HOSTOR2	0.409475	2.18166	0.491252	-0.466081	0.120658	-0.57412	-1.33064	-0.406325
HOSTOR2	1.86901	-0.238959	0.597702	1.11034	0.315873	1.41069	-0.717534	0.249096
GOMVAC	-0.678057	-1.53639	-1.67651	-0.906578	-0.530036	-1.24711	1.45386	-0.795164
GOMVAC	-1.48481	0.551853	0.141112	-1.04166	1.82269	1.14968	-0.697717	-0.699966
GOMVAC	-1.78091	1.15362	-0.202101	-0.29699	1.44341	-0.957731	0.723025	-0.183728
GOMVAC	-0.107403	1.51046	0.49543	-3.22969	-0.0709029	1.24421	-1.47826	-0.786567
GOMVAC	0.480029	1.33473	-1.19639	-1.00999	1.22744	-1.30524	1.26007	-0.556637
GOMVAC	0.822083	-0.573516	-0.304684	-1.95151	1.89134	1.49943	-1.31272	0.262532
GOMVAC	-0.828611	-1.47947	0.346292	0.99396	0.0326331	-1.66473	-0.566134	-0.272697
GOMVAC	1.89353	0.611029	-0.940244	-1.89528	-0.216997	-0.174214	-0.61155	0.211523
GOMVAC	0.731501	-0.187497	-2.22525	0.934957	0.0456039	2.96275	-0.968216	-0.447929
GOMVAC	0.10115	-0.565374	-1.98479	-0.172843	-0.567542	-0.0528336	-1.16247	0.120921
GOMVAC	-0.645862	-1.59792	-1.9239	-0.0593773	1.0082	0.260428	0.594955	-0.686535
GOMVAC	0.672055	0.48492	-0.492703	-0.29898	3.08273	-0.518739	-1.40371	0.926642
GOMVAC	0.135225	1.20818	0.453104	-0.835278	-0.0570551	-0.506691	-0.0118017	1.94153
GOMVAC	-2.35445	0.770134	1.88652	-1.97928	0.27485	0.713173	-0.624216	1.05847
GOMVAC	-1.11072	-1.03654	2.25316	-1.61668	-0.960265	1.30637	0.565935	0.127553
GOMVAC	0.874285	-1.32724	-0.256462	-0.879554	2.16625	0.24335	0.808198	1.67624
MORVER	-2.78372	-0.501481	0.737132	-1.03561	0.823565	-1.59745	-0.369457	-0.873898
MORVER	-2.17042	0.782713	1.33476	0.561525	0.18982	-0.497224	1.33411	0.132197
MORVER	-3.11323	-0.73716	1.89763	-0.0451393	0.0505409	1.27927	-0.749792	-0.410215
MORVER	-2.39346	0.73555	1.26692	-0.741024	0.708181	-0.709532	-0.578181	-0.515634
BUKIZB	-1.003	-3.27397	-0.443105	2.58179	0.924817	-0.407521	0.176556	-0.314168
BUKIZB	-1.60194	-0.166066	-1.71907	-0.0221463	-0.827082	0.898158	0.688289	-2.09012
BUKIZB	0.510855	-1.01935	-0.160613	-0.0303973	1.21386	0.840393	-0.9189	-0.393496
BUKIZB	0.469181	-1.10841	-0.738004	-0.836432	0.0052614	-0.974394	-0.63284	0.731889
BUKIZB	1.02982	-0.129891	-0.832987	-0.253629	0.23185	0.292456	-0.339628	-0.770467
BUKIZB	-0.440684	-2.14861	-1.22459	0.56959	-1.04498	-0.565931	-1.30374	-0.425959
BUKIZB	-1.71513	0.782216	-0.234592	0.733099	-0.0214828	1.18755	-0.847725	-0.347694
BUKIZB	0.524088	-0.634933	0.904706	0.504955	-0.606608	-0.638405	1.07424	-0.502692
BUKIZB	-1.6591	-1.03485	-0.0662476	1.02905	1.30779	0.702357	1.88195	1.16066
BUKSZE	1.03992	-1.68415	-0.584391	0.3743	-2.45861	0.0654167	1.20128	-1.84251
BUKSZE	-0.58656	-1.03324	-0.126351	-0.22988	0.118157	-0.748139	1.3298	0.0123161
BUKSZE	-1.1035	-1.38666	1.60101	1.32439	-0.298337	0.250377	0.449682	1.91419
BUKSZE	0.471643	-0.526709	-1.42793	0.161009	1.25739	-0.59052	0.179794	-0.332123
BUKSZE	-0.0794587	0.543524	-0.733656	0.0952895	-2.20314	0.574096	0.0415127	-0.631556
BUKSZE	0.073428	-2.31329	1.50541	-0.883477	-0.0597655	-0.219936	-1.18085	-0.0686562
BUKSZE	-0.559763	-0.817897	-1.26266	0.491908	-0.630169	0.342525	0.910139	-0.555455
BUKSZE	-0.4065	-1.98383	0.0325423	0.174177	1.31727	-1.79608	0.846797	0.766848
BUKSZE	-1.64412	-0.189969	-1.35382	-0.257734	-0.491358	0.827847	-1.00756	1.18489
BUKSZE	-1.36744	-1.45922	-0.467524	-0.67922	0.165887	-0.283892	0.921663	-0.870248
BUKSZE	0.858554	-2.01164	0.606749	3.72823	-0.0451714	-0.677203	-0.112296	-0.0873713
BUKSZE	-0.711833	-1.48799	-0.873115	-0.138023	-0.0825484	0.0871986	0.304829	1.74121
BUKSZE	-0.427563	-2.13061	-1.54592	-1.51011	-1.49587	-0.08005	-0.304156	-0.264641
BUKSZE	-0.626654	-0.0636052	0.476901	-1.122	-0.0585836	-0.707322	0.163204	1.62329
BUKSZE	-0.943485	-1.82976	-1.22131	-0.282316	-1.46087	-0.0508082	-0.715088	0.0396973
BUKSZE	-0.0678691	-0.733949	0.168234	1.04844	0.182614	-1.47812	-0.192032	1.52325
BUKSZE	0.909119	-1.71358	-2.61554	-1.33845	-2.42169	0.530842	0.479144	-0.571198
BUKSZE	-0.338765	-1.69139	-1.09108	-0.409197	0.493652	0.584624	-0.970168	0.729814
BUKSZE	0.261135	-1.38585	1.25029	-0.332258	0.0987373	0.675508	-0.911484	-1.12436
BUKSZE	0.169368	-2.76995	-0.276823	-0.354559	-0.184967	1.03761	0.777831	-0.480097
BUKSZE	-1.30338	-0.869762	-0.580868	-1.15695e-05	-0.343301	-0.781562	-0.743425	-0.165039
BUKSZE	1.17783	-0.776818	1.54709	-0.316748	0.722531	0.357874	-0.872603	-0.288863
BUKSZE	-0.836967	-1.14873	-0.969082	-0.691695	-0.0955463	0.149617	1.74712	-0.00685241
BUKTOR	0.591614	0.908322	0.400976	1.90787	-0.131226	-0.158468	0.150562	-1.35475
BUKTOR	0.442964	1.83554	-1.66893	1.07059	1.17962	0.559904	-0.844792	-0.970249
BUKTOR	1.26504	1.64204	-1.33944	1.33569	-0.196735	-0.968312	-1.014	0.954648
BUKTOR	0.11908	1.1071	-0.167261	0.540531	1.13418	0.316591	-0.129932	1.54647
BUKTOR	-0.778705	0.921694	-1.33705	2.69495	-1.26694	0.0715489	1.25076	0.814408
BUKTOR	-1.26916	1.51517	-1.86851	0.980347	0.935905	0.736439	1.31216	-1.39571
BUKTOR	-2.1556	1.43137	-1.57643	0.0752422	-0.716037	1.01178	-0.571501	0.165075
BUKTOR	0.453677	0.464393	-1.84606	0.0568318	0.594238	-0.457046	-0.195975	0.642577
BUKTOR	0.770902	0.831466	-1.03667	-1.03753	0.91771	1.01234	0.575976	0.594129
BUKTOR	0.123508	0.961951	-1.97362	-0.342881	0.23312	0.639124	0.831022	0.980528
BUKTOR	-0.694001	1.39639	-0.169202	1.45166	-1.58535	-0.831876	-1.84387	-0.712865
BUKTOR	-0.679271	0.326087	-0.805128	-0.0374947	1.03263	0.421146	1.46728	-1.02684
BUKTOR	-0.989124	0.556014	-0.181683	-0.501812	-0.146922	-0.893923	-1.48174	0.96775
BUKTOR	-0.314927	0.200445	0.252164	1.49763	0.960771	0.865857	0.755271	0.262528
BUKTOR	-0.506196	1.15906	-0.656433	0.182951	0.609402	0.627624	1.05856	-1.73092
BUKTOR	-0.920822	1.50929	-1.13244	0.0346653	1.68445	0.519623	0.25954	-1.58105
BUKTOR	0.301339	-0.213809	-1.29911	-1.33555	1.38393	-0.429344	0.872053	1.35305
BUKTOR	0.828318	-0.0266964	0.200233	0.208869	-0.619085	-0.322538	-1.12861	0.121918
BUKTOR	-0.770706	-0.0138878	0.255103	-0.653355	-1.51113	-0.511228	3.32071	0.949178
BUKTOR	0.0824966	1.14001	-0.493728	-0.784058	-1.28183	0.131336	0.526534	-0.678164
BUKTOR	1.57751	0.363428	-0.725681	-0.24279	1.16695	-0.755701	0.488378	-0.48624
HOSKAM	-0.734619	0.129812	2.39791	-2.04744	-0.886185	2.01319	0.515533	-0.699326
HOSKAM	1.84149	0.926784	-0.366831	-0.72439	-0.73307	-0.312094	0.129776	0.0950244
HOSKAM	1.94699	-0.472993	1.04638	-0.0912623	0.125745	0.788364	-0.451175	0.104678
HOSKAM	1.65294	0.716221	1.16571	-0.590467	-0.605294	0.644832	0.448945	-0.326786
HOSKEL	-0.403432	0.940332	-0.839956	0.801088	-1.17191	-0.393051	0.368292	0.0937863
HOSKEL	0.278559	1.14918	-0.159607	-0.585821	0.545619	-1.33235	0.111283	-0.68807
HOSKEL	-0.453217	1.03682	0.624181	0.288432	1.52547	1.53058	-1.78122	0.775531
HOSKEL	1.89576	0.494103	1.2149	-0.0608108	-0.0170267	0.158799	1.45666	-0.516768
HOSKEL	0.9118	-0.153995	-0.822431	-0.586872	-1.34084	-1.40416	0.0240376	-0.579508
HOSKEL	-0.313185	0.935587	0.842769	-0.710061	-0.457073	1.69048	2.37435	0.754254
HOSKEL	0.763122	0.961405	1.55854	-0.10464	-1.95023	-1.55881	-0.259211	-1.69692
HOSKEL	-0.141067	-0.16783	0.664009	-1.53306	-0.79869	0.815198	-1.30038	-0.307567
HOSKEL	0.652102	1.72022	0.404248	1.466	-1.55249	-0.726707	0.693572	0.796396
HOSKEL	0.341301	-0.338275	-0.303994	-0.332842	2.0673	0.796166	-0.400099	2.27629
HOSKEL	0.218588	0.211456	-1.87189	1.25545	1.4332	0.0654024	0.74977	-1.27928
HOSKEL	2.05085	1.55829	-0.466146	1.25237	-0.64558	1.2092	-0.586042	1.35589
HOSTOR	0.0212403	1.14253	-2.80593	-0.162712	-1.25833	-1.81923	-0.744781	0.417014
HOSTOR	-0.227439	2.69563	-1.00093	2.22689	1.24043	2.26122	-0.357436	-1.47213
HOSTOR	-0.878858	0.596405	-0.807826	0.317005	1.02709	-0.854712	-1.83169	-0.00751267
HOSTOR	-0.40532	-1.6484	0.681154	2.16093	-0.787948	-0.923777	-0.814582	0.586315
HOSTOR	0.912673	-0.473137	-1.63317	-0.167791	-1.8171	0.72696	-0.421719	0.31883
