# Supplementary material for: Effects of pharmaceutically active compounds (PhACs) on fish body and scale shape in natural waters
Source: PeerJ. 2021 Feb 11;9:e10642. doi: 10.7717/peerj.10642 (PMC7882141; doi:10.7717/peerj.10642)
Supplement: Supplemental Information 6 [file peerj-09-10642-s006.xlsx]

## Sheet: CV-scores for gibel carp body
Group	CV1	CV2	CV3
GERCEG	-0.40358	-1.43672	1.03454
GERCEG	0.16912	-1.62035	0.59644
GERCEG	-3.48873	0.130394	1.93442
GERCEG	-0.355766	-2.39929	0.214507
GERCEG	0.682136	-1.23883	1.18003
GERCEG	-1.185	0.328993	-0.167486
GERCEG	1.28546	-1.62339	1.5831
GERCEG	-1.85183	-2.8177	0.616328
GERCEG	-0.497102	-0.690303	0.729456
GERCEG	-0.0439263	-0.0950421	-0.0477387
GERCEG	-0.173737	-1.17392	1.38302
GERCEG	-3.33474	-1.3637	-0.55643
GERCEG	0.999492	-1.18502	0.727118
GERCEG	-1.57787	0.556018	-1.10874
GERCEG	-0.883041	-0.410947	0.357452
GERCEG	-0.243216	-1.13336	3.19779
GERCEG	-0.801403	-2.04646	-0.0746757
GERCEG	-1.38094	-1.36669	-0.2812
GERCEG	-1.79878	-2.63282	0.268572
GERCEG	-0.44529	-0.901979	0.162549
GERCEG	1.20634	-0.190781	0.10059
GERCEG	-1.37505	-1.69524	-0.144552
GERCEG	-0.857113	-2.26298	1.34348
GERCEG	-1.22389	-1.75834	-0.27653
GERCEG	-2.2194	-2.70187	-0.380998
GERCEG	0.982055	-1.37912	0.200858
GERTOR	2.64776	0.912908	0.204155
GERTOR	3.24469	1.03789	-1.08023
GERTOR	4.56762	-0.783894	-0.96619
GERTOR	3.46328	1.76116	0.923913
GERTOR	3.55423	-2.77958	1.71983
GERTOR	3.68517	1.48892	-0.15183
GERTOR	1.61432	-0.458881	-0.367216
GERTOR	2.90087	-1.3237	-0.249938
GERTOR	3.33148	-0.948225	0.993134
GERTOR	2.55041	0.798587	0.0949346
GERTOR	3.26452	-0.0553462	0.142907
GERTOR	5.01385	-0.794081	0.332006
GERTOR	3.08954	-0.112978	-0.0678404
GERTOR	2.72161	1.71233	0.888338
GERTOR	3.63798	-0.193635	1.19061
GERTOR	4.66692	0.664403	-0.73889
HOSKEL	-1.51235	0.662177	0.46845
HOSKEL	-2.10462	2.54507	1.73729
HOSKEL	-0.422106	1.68345	3.37998
HOSKEL	-0.58958	1.79404	2.9657
HOSKEL	-1.63751	1.77595	3.39165
HOSKEL	-2.61172	0.230729	1.14397
HOSKEL	-2.38786	0.275455	2.01124
SZEBIC	-1.22695	-0.370763	-1.19065
SZEBIC	-1.46482	0.0304461	-2.27308
SZEBIC	-1.38342	0.880978	-2.43747
SZEBIC	0.243535	1.17371	-1.79736
SZEBIC	0.473591	-0.0771673	-2.38505
SZEBIC	-1.00554	1.74107	-2.29493
SZEBIC	-0.824899	0.779615	0.181398
SZEBIC	0.316386	-2.15155	0.522746
SZEBIC	-1.80289	0.0761362	-3.02255
SZEBIC	-0.973331	0.433149	-1.09491
SZEBIC	-1.34562	-0.470313	-1.44504
SZEBIC	0.0485724	-0.661978	-1.71244
SZEBIC	-1.68751	-0.343573	-1.08557
SZEBIC	-2.23519	-1.69957	-1.71734
SZEBIC	0.470196	1.3408	-1.51786
SZEBIC	-1.21196	0.351673	-1.04753
SZEBIC	-0.415858	-0.070604	-0.861977
SZEBIC	-1.50867	0.135046	-0.844184

## Sheet: CV-scores for gibel carp scale
Group	CV1	CV2	CV3	CV4
BENBIA	-0.0419929	-0.87456	0.0811112	1.1311
BENBIA	0.709565	-1.53047	0.439958	-0.282872
BENBIA	-1.44277	2.34798	0.293693	0.202662
BENBIA	-1.68861	-0.751342	-1.54643	-1.23803
BENBIA	-2.52197	0.139659	0.95716	1.5376
BENBIA	-3.50576	-0.854704	-0.82276	2.32776
BENBIA	-0.223353	-0.518262	0.833166	0.759053
BENBIA	0.479908	0.0164139	-1.50001	0.47887
BENBIA	-2.11115	-2.30673	-0.509894	-0.529769
BENBIA	-1.50383	-0.693862	-0.415675	-0.195302
BENBIA	-1.79147	0.2712	-1.52925	-0.388721
BENBIA	-2.1145	-2.73131	1.73733	0.736708
BENBIA	-1.91772	-0.435536	-0.609383	1.02316
BENBIA	-2.44354	-0.715004	0.400167	0.042813
SZEBIC	-1.14601	0.852021	-1.54502	0.81771
SZEBIC	-0.554136	-2.87289	0.16687	-0.962466
SZEBIC	0.112119	0.691823	-0.558726	0.740191
SZEBIC	-0.270405	0.783647	1.24783	0.875537
SZEBIC	-1.28502	-1.13622	-0.72325	0.782748
SZEBIC	1.10697	-1.50825	0.591589	1.32409
SZEBIC	0.817467	0.813913	-1.88331	-0.0391827
SZEBIC	1.45207	-0.810022	-1.16366	-1.42004
SZEBIC	-0.280334	0.417269	-0.345586	-1.06671
SZEBIC	0.669799	0.543519	-0.680866	1.88119
SZEBIC	-0.0700888	-1.81017	-1.44827	0.149052
SZEBIC	-1.24934	-0.328435	-0.553596	1.11676
SZEBIC	-0.441303	0.171718	-0.20147	0.639058
SZEBIC	0.472066	-0.492867	0.695698	-0.981113
SZEBIC	1.11454	-1.18142	-0.833405	1.00425
SZEBIC	-0.0107047	-0.0428968	-0.575746	0.927657
SZEBIC	0.272915	0.0641358	-0.047561	-2.23729
SZEBIC	-1.64467	0.561627	-2.41263	-0.5914
HOSKEL	-1.1193	0.445263	0.928506	1.07804
HOSKEL	0.464758	-0.289975	1.39026	1.59335
HOSKEL	-1.03766	0.0365523	2.05397	1.28914
HOSKEL	0.872775	-0.432794	1.0936	-2.63859
HOSKEL	0.500353	-1.22119	2.39111	0.310225
HOSKEL	0.793953	-0.453772	1.56751	-0.612316
HOSKEL	1.41177	0.256113	0.0590713	-0.230075
HOSTOR	-1.83064	-0.391188	-1.5256	1.48914
HOSTOR	1.80751	0.682976	0.666659	-0.685766
HOSTOR	-0.210204	2.53807	-1.09725	0.309002
HOSTOR	0.91854	-0.669815	0.0565282	-0.871676
HOSTOR	-1.07091	-1.46531	1.32986	0.713287
HOSTOR	-1.11015	0.924698	-1.1516	0.413144
HOSTOR	0.585702	1.13372	-1.90893	-1.13144
HOSTOR	0.231086	0.211269	0.0303446	-1.19508
HOSTOR	0.158992	-0.181865	-1.63177	0.312222
HOSTOR	-0.185562	0.735546	-0.775265	-0.99862
HOSTOR	-1.52075	1.51921	1.0183	-0.573966
HOSTOR	1.03425	0.00315864	0.81516	-0.368687
HOSTOR	-1.10657	4.4215	1.08899	-2.24888
HOSTOR	1.28462	0.831139	-1.27332	-0.587828
HOSTOR	-1.76962	1.45895	-0.0773173	-1.17047
GERTOR	0.400366	-0.324136	-2.53106	-1.5861
GERTOR	0.949637	-0.364362	-0.474448	-0.456488
GERTOR	-0.159973	-0.601245	1.61327	-1.3371
GERTOR	1.03291	0.43348	-2.21692	0.107238
GERTOR	1.74956	-0.327808	-1.91375	0.808707
GERTOR	1.31374	-1.033	0.78359	1.53924
GERTOR	-1.2114	-0.512105	0.647979	-0.0889352
GERTOR	0.130958	-0.517835	-0.830315	0.159505
GERTOR	0.518397	1.22446	-0.132114	-0.0221882
GERTOR	1.82575	-0.17827	-0.246729	-1.6488
GERTOR	-0.0603688	-0.441063	-1.30468	-1.67508
GERTOR	0.130475	0.151408	-1.17335	-0.0390376
GERTOR	0.996514	0.57772	0.362206	-1.06442
GERTOR	2.01435	-0.19804	0.0237735	-1.50197
