# Supplementary material for: Effects of pharmaceutically active compounds (PhACs) on fish body and scale shape in natural waters
Source: PeerJ. 2021 Feb 11;9:e10642. doi: 10.7717/peerj.10642 (PMC7882141; doi:10.7717/peerj.10642)
Supplement: Supplemental Information 7 [file peerj-09-10642-s007.xlsx]

## Sheet: Munka1
Code	caffeine	theophyllin	paracetamol	lidocaine	carbamazepine	naproxen	ketamin	bupropion	pethidine	lacosamide	lamotrigine	propranolol	tramadol	mirtazapine	metoprolol	nordiazepam	trimetazidine	diazepam	oxazepam	benzoyl-ecgonine	diclofenac	metoclopramide	temazepam	cocaine	betaxolol	zolpidem	codeine	warfarin	alprazolam	olanzapine	methadone	citalopram	ethylmorphine	bisoprolol	midazolam	clozapine	tiapride	propafenone	cinolazepam	perindopril	trazodone	losartan	fentanyl	drospirenone	quetiapine	risperidone	verapamil	zopiclone	carvedilol
roach scale
VALBAR				116.375	250						496.875		102.325		10.235					0.73	47.805			1.95				0.7	2.445			0.53				0.35	9.985	1.495	44.075	58.14		19.885				1.23	0.895
DTCDUN				39.545	106.965		14.335				157.73	2.215	25.96	0.925	52.38	0.235	21.36	0.605		2,17	39.17			0.28		0.255		0.325	0.68		0.37			12.615		1.43	7.345	8,28	8.065	16.585	0.945	6.265			0.83
TAPUJS	247.982			41.882	216.074						904.553		72.498		1.163						52.475								3.827	10.194						2.829	111.018		22.282	33.0735		4.6065		2.9995
SZEBIC	1119			5.956	28.0795								0.7285																								1.6855
TAPGYO	1294.75			59.8655	120.732		16.6925				2163.37	0.4905	124.103		1.0355				3.239		357.842								12.4545	28.9165						8.977	123.73		89.015	152.406		13.886
GERTOS	1627.15			69.428	319.076		8.7935		0.296	82.549	14338.3		126.457	2.8065	6.3775		209.463		5.5805		2201.7	1.1005							20.561					1.322		21.1705	153.329		267.815	285.461		137.922
chub scale
HOSTOR2	49.14			133.91	360.76		12.07	0.8		5.65	1431.87	14.87	454.58		139.11	2.75		0.29	3.84	2.14	109.66		2.2	0.43	6.35	1.27		0.88	9.12			6.23		154.72		12.5	112.84	80.35	65.88	173.16		165.93					0.96	2.75
GOMVAC	181.73		550.82	28.01	112.92	287.13				16.02	84.79	4.84		5.46	51.67						12.91			21.84	5.02		20.03		2.51			3.18		47.69			0.52	11.72	3.46	20.76		1.18					0.18		0.33
MORVER				0.72	5.09			5.19			77.73		19.05																					1.56				0.85	2.17	2.34
BUKIZB	1255.42	61.394																						0.261
BUKSZE	142.246			1.5045	2.625								0.4815	0.227							5.235																2.743			0.7575		0.224
BUKTOR	1622.8	68.858									12.663		0.1465	0.216																							1.195						0.307
HOSKAM		874.173		58.9935	243.6		13.979		1.196	49.098	4358.33	13.33	83.9925	66.31	150.161						2070.72	23.626			0.681	4.384			14.0125	43.588	1.202	20.942	15.8685		4.3705	53.478	153.072		364.836	99.9115	1.0315						2.609
HOSKEL		548.534		70.41	199.899				1.218	39.069	3456.27	7.363	97.726	15.474	121.426				3.031	1.9175	816.765	0.617	3.35			1.6155			15.36	54.0705		5.322	11.9155			26.592	163.187	12.609	316.846	212.497		51.9185
HOSTOR	2612.1	355.338		76.245	205.887			7.4315	0.8505	31.669	3351.2	4.531	102.175	9.7845	88.655					2.2225	778.479	0.4865	4.504			1.856			17.2385			2.5785	9.113	27.0745		23.2695	177.606	5.581	394.197	284.659		34.6405
gibel carp scale
BENBIA				97.255	417.23		4.775	3.44			403.59	7.625	50.885	2.985	64.8	0.48	136.125			1.66		0.775		2.43		0.29			2.46	8.56		6.085		21.305		2,13	11.235	46.095	24.565	49.985		9.435					3.025
SZEBIC	13635			32.536	323.073								3.4655																								4.4835
HOSKEL		548.534		70.41	199.899				1.218	39.069	3456.27	7.363	97.726	15.474	121.426				3.031	1.9175	816.765	0.617	3.35			1.6155			15.36	54.0705		5.322	11.9155			26.592	163.187	12.609	316.846	212.497		51.9185
HOSTOR	2612.1	355.338		76.245	205.887			7.4315	0.8505	31.669	3351.2	4.531	102.175	9.7845	88.655					2.2225	778.479	0.4865	4.504			1.856			17.2385			2.5785	9.113	27.0745		23.2695	177.606	5.581	394.197	284.659		34.6405
GERTOR	842.507	43.5745		31.2195	115.197						385.99		23.8075								6.1025		0.55														29.0925		23.46	2.1345		1.3155
roach body
GERTOS				51.7735	821.385					4.3145	3624.01	0.704	72.298		12.9935	1.1745	44.592		1.983		167.719		1.0135						6.8515					3.594		1.5305		7.4935	96.0215	34.4985		41.7815
SZEBIC	1119			5.956	28.0795								0.7285																								1.6855
TAPUJS				27.578	463.989						394.303	0.364	29.9805		2.205	0.3505					42.803								1.4355			0.9415				2.259		0.6515	12.5055	7.083		1.592
TAPTAP	476.938	214.123		53.0685	226.726		5.7865				1563.29	2.049	122.842	9.969	23.031	1.85			2.498	1.486	327.531	0.4775	1.5075	0.2635		0.3935			5.206	16.639		5.589		4.8305		6.2275	157.826	10.9	32.947	56.4925		18.0465
TAPGYO	1294.75			59.8655	120.732		16.6925				2163.37	0.4905	124.103		1.0355				3.239		357.842								12.4545	28.9165						8.977	123.73		89.015	152.406		13.886
TAPSZE	461.921	159.305		52.1465	242.952		4.992				1539.35	0.8485	97.5175	1.2445	8.691	1.524				2.208		0.4515	1.1055			0.1965			4.1785	9.031		1.41				5.711	138.918	3.5475		39.898		19.6725
TAPUJS2	247.982			41.882	216.074						904.553		72.498		1.163						52.475								3.827	10.194						2.829	111.018		22.282	33.0735		4.6065		2.9995
chub body
BUKIZB	1255.42	61.394																						0.261
BUKSZE	142.246			1.5045	2.625								0.4815	0.227							5.235																2.743			0.7575		0.224
BUKTOR	1622.8	68.858									12.663		0.1465	0.216																							1.195						0.307
HOSKAM		874.173		58.9935	243.6		13.979		1.196	49.098	4358.33	13.33	83.9925	66.31	150.161						2070.72	23.626			0.681	4.384			14.0125	43.588	1.202	20.942	15.8685		4.3705	53.478	153.072		364.836	99.9115	1.0315						2.609
HOSKEL		548.534		70.41	199.899				1.218	39.069	3456.27	7.363	97.726	15.474	121.426				3.031	1.9175	816.765	0.617	3.35			1.6155			15.36	54.0705		5.322	11.9155			26.592	163.187	12.609	316.846	212.497		51.9185
HOSTOR	2612.1	355.338		76.245	205.887			7.4315	0.8505	31.669	3351.2	4.531	102.175	9.7845	88.655					2.2225	778.479	0.4865	4.504			1.856			17.2385			2.5785	9.113	27.0745		23.2695	177.606	5.581	394.197	284.659		34.6405
gibel carp body
GERCEG	626.72			47.324	116.249		47.7165				4192.61		94.2065	1.8465	9.8545						607.611								13.2755			0.217				13.17	112.082	1.2785	148.919	227.308		39.3385
GERTOR	842.507	43.5745		31.2195	115.197						385.99		23.8075								6.1025		0.55														29.0925		23.46	2.1345		1.3155
HOSKEL		548.534		70.41	199.899				1.218	39.069	3456.27	7.363	97.726	15.474	121.426				3.031	1.9175	816.765	0.617	3.35			1.6155			15.36	54.0705		5.322	11.9155			26.592	163.187	12.609	316.846	212.497		51.9185
SZEBIC	13635			32.536	323.073								3.4655																								4.4835
[truncated: 5 more columns]
